# Supplementary material for: Risk of preterm birth by maternal age at first and second pregnancy and race/ethnicity
Source: publisher site journal article supplement (doi:10.1515/jpm-2017-0014), 2017-04-29
Supplement: Supplementary file 1 [file Supplementary_Figure_1.docx]

Supplementary Figure 1. Sample selection

All California live born singletons born between 2005 through 2011 (n = 3,767,337)

Not missing maternal age for both pregnancies (n = 300,410)

Infants had no major malformations (n = 290,834)

First and second pregnancies (n = 374,403)

Gestation at birth between 20 and 44 weeks (n = 319,200)

Maternal race/ethnicity white non-Hispanic, Hispanic, black non-Hispanic, or Asian non-Hispanic (n = 300,572)
