# Supplementary material for: Risk of preterm birth by maternal age at first and second pregnancy and race/ethnicity
Source: publisher site journal article supplement (doi:10.1515/jpm-2017-0014), 2017-04-29
Supplement: Supplementary file 2 [file Supplementary_Table_1.docx]

Supplementary Table 1. Preterm birth rate in the first and second pregnancies by race-ethnicity

| Any preterm birth | White non-Hispanic | |  | Hispanic | |  | Black non-Hispanic | |  | Asian non-Hispanic | |
| --- | --- | --- | --- | --- | --- | --- | --- | --- | --- | --- | --- |
| **N** | **%** |  | **N** | **%** |  | **N** | **%** |  | **N** | **%** |
| **Overall Sample** | 93,418 | 100.0 |  | 141,326 | 100 |  | 11,799 | 100 |  | 44,291 | 100 |
| Both pregnancies | 1,051 | 1.1 |  | 1,916 | 1.4 |  | 225 | 1.9 |  | 591 | 1.3 |
| First pregnancy | 5,864 | 6.3 |  | 11,265 | 8.0 |  | 1,085 | 9.2 |  | 3,121 | 7.0 |
| Second pregnancy | 4,263 | 4.6 |  | 8,318 | 5.9 |  | 897 | 7.6 |  | 2,672 | 6.0 |
| Either pregnancy | 9,076 | 9.7 |  | 17,667 | 12.5 |  | 1,757 | 14.9 |  | 5,202 | 11.7 |
| Neither | 84,342 | 90.3 |  | 123,659 | 87.5 |  | 10,042 | 85.1 |  | 39,089 | 88.3 |
